# Supplementary material for: Novel class IIb microcins show activity against Gram-negative ESKAPE and plant pathogens
Source: eLife. 2024 Dec 11;13:RP102912. doi: 10.7554/eLife.102912 (PMC11634061; doi:10.7554/eLife.102912)
Supplement: Supplementary file 1. — Red color indicates no significant match found. [file elife-102912-supp1.xlsx]

## Sheet: Sheet1
Supplementary File 1: Blastp results and closest matches to the known or novel class IIb microcins. Red color indicates no significant match found.
Microcin name	Species	Accession no.	Antimicrobial Gene Name	Antimicrobial closest global match	Identical/Total Length	E-value	Immunity Gene Name	Immunity closest global match	Identical/Total Length	E-value
Bg X	Brenneria goodwinii	CP014137	Bg XA	Ro XA	55/98	2e-12	Bg XI	Ro XI	29/78	4e-14
Gq W	Gibbsiella quercinecans	CP014136	Gq WA	Bg E492A	24/96	0.37	Gq WI	Se MI	24/74	0.25
Ro Z	Raoultella ornithinolytica	CP008886	Ro ZA	Ec MA (mcmA)	21/64	0.001	Ro ZI	Sf H47I	12/74	0.41
Ro X	Raoultella ornithinolytica	CP008886	Ro XA	Bg XA	52/99	4e-13	Ro XI	Bg XI	29/61	4e-07
